# Supplementary material for: Nonlinear Association of Total Physical Activity with Cognitive Impairment in Older Chinese Adults: A Cross-Sectional Analysis of CHARLS
Source: Research Square preprint supplement (doi:10.21203/rs.3.rs-7763220/v1), 2025-11-19
Supplement: Supplementary file 1 [file 40b0da0ac6fcfc9559d314e5.docx]

**TABLE S1. Sensitivity analyses of the association between total physical activity (TPA) and cognitive impairment**

| **Specification** | **Group** | **OR** | **95% CI** | **p-value** | **N** |
| --- | --- | --- | --- | --- | --- |
| Exclude age >85 | Q2 vs Q1 | 0.96 | 0.76–1.21 | 0.722 | 5911 |
| Q3 vs Q1 | 1.18 | 0.94–1.47 | 0.147 | 5911 |
| Q4 vs Q1 | 1.40 | 1.10–1.77 | 0.005 | 5911 |
| Outcome ≤–1.5 SD | Q2 vs Q1 | 0.88 | 0.66–1.16 | 0.366 | 5952 |
| Q3 vs Q1 | 1.15 | 0.88–1.50 | 0.311 | 5952 |
| Q4 vs Q1 | 1.37 | 1.06–1.77 | 0.016 | 5952 |

*Notes:* Odds ratios (ORs) and 95% confidence intervals (CIs) from logistic regression with HC3 robust standard errors. Sensitivity analyses exclude participants aged >85 years and apply an alternative cognitive impairment threshold (≤–1.5 SD).

**Table S2. Multi-wave analyses including BMI and wave fixed effects**

| **Exposure** | **OR** | **95% CI** | **p-value** | **N (unique)** | **Obs** |
| --- | --- | --- | --- | --- | --- |
| log(PA) per +1SD | 0.90 | 0.84–0.97 | 0.008 | 4617 | 6299 |

Notes: Logistic regression with HC3 robust standard errors, clustered by individual ID, including BMI and survey wave fixed effects (2011–2018).

**TABLE S3. Extended models including both total physical activity (TPA) and water intake**

| **Exposure** | **Group** | **OR** | **95% CI** | **p-value** | **N** |
| --- | --- | --- | --- | --- | --- |
| PA quartiles | Q2 vs Q1 | 0.97 | 0.78–1.22 | 0.817 | 5947 |
| Q3 vs Q1 | 1.19 | 0.95–1.48 | 0.131 | 5947 |
| Q4 vs Q1 | 1.39 | 1.10–1.76 | 0.006 | 5947 |
| Water intake | per +1SD | 0.95 | 0.88–1.03 | 0.207 | 5947 |

Notes: Logistic regression with HC3 robust standard errors, including both TPA and water intake in the same model. TPA quartiles defined after 1%/99% winsorization.

**TABLE S4. Full stratified subgroup analyses of the association between total physical activity (TPA) and cognitive impairment**

| **Modifier** | **Stratum** | **Contrast** | **OR** | **95% CI** | **p-value** | **N** |
| --- | --- | --- | --- | --- | --- | --- |
| **Age group** | 60–69 | Q2 vs Q1 | 1.09 | 0.79–1.53 | 0.593 | 3901 |
| Q3 vs Q1 | 1.52 | 1.11–2.07 | 0.008 | 3901 |
| Q4 vs Q1 | 1.70 | 1.23–2.34 | 0.001 | 3901 |
| log(PA) per +1SD | 1.15 | 1.00–1.33 | 0.058 | 3901 |
| **Age group** | 70–79 | Q2 vs Q1 | 0.94 | 0.64–1.38 | 0.758 | 1753 |
| Q3 vs Q1 | 0.96 | 0.65–1.42 | 0.834 | 1753 |
| Q4 vs Q1 | 1.18 | 0.77–1.80 | 0.450 | 1753 |
| log(PA) per +1SD | 0.91 | 0.79–1.05 | 0.199 | 1753 |
| **Age group** | ≥80 | Q2 vs Q1 | 0.84 | 0.27–2.65 | 0.769 | 298 |
| Q3 vs Q1 | 0.88 | 0.28–2.78 | 0.826 | 298 |
| Q4 vs Q1 | 1.22 | 0.21–7.17 | 0.827 | 298 |
| log(PA) per +1SD | 1.07 | 0.74–1.55 | 0.717 | 298 |

Notes: Other stratified results, including sex, urban/rural residence, education, depressive symptoms, and digestive comorbidity, are provided in the Supplementary Materials.

Odds ratios (ORs) and 95% confidence intervals (CIs) were estimated using logistic regression with HC3 robust standard errors, stratified by subgroup (sex, age group, urban/rural residence, education, CES-D10, and digestive comorbidity). Models were adjusted for age, sex, education, marital status, urban/rural residence, smoking, drinking, sleep duration, CES-D10 score, chronic conditions, instrumental activities of daily living (IADL), and digestive comorbidity, unless used as the stratifying variable. TPA quartiles were defined after 1%/99% winsorization: Q1 < 1,732.5; Q2 < 4,158.0; Q3 < 9,198.0 MET-min/week. Continuous exposure was modeled as log-transformed TPA per 1-SD increase.

**TABLE S5. Interaction tests of total physical activity (TPA) with subgroup modifiers**

| **Modifier** | **Test** | **df** | **χ² statistic** | **p-value** | **N** |
| --- | --- | --- | --- | --- | --- |
| Age group | PA quartiles × modifier | 6 | 10.41 | 0.108 | 5952 |
| Age group | Continuous log(PA) × modifier | 2 | 8.15 | 0.017 | 5952 |
| CES-D10 | PA quartiles × modifier | 3 | 0.75 | 0.862 | 5952 |
| CES-D10 | Continuous log(PA) × modifier | 1 | 0.00 | 0.950 | 5952 |
| Digestive comorbidity | PA quartiles × modifier | 3 | 4.68 | 0.197 | 5952 |
| Education (Low/High) | PA quartiles × modifier | 3 | 5.23 | 0.155 | 5952 |
| Sex | PA quartiles × modifier | 3 | 0.78 | 0.854 | 5952 |

Notes: Interaction terms between PA quartiles (Q1–Q4) or continuous log-transformed TPA and subgroup variables were included in logistic regression models with HC3 robust standard errors. Wald χ² tests were applied to evaluate statistical significance. Degrees of freedom (df), χ² statistics, and p-values are reported.

**TABLE S6. Benjamini–Hochberg FDR adjusted p-values for interaction tests**

| **Modifier** | **Test family** | **df** | **χ² statistic** | **Raw p-value** | **q-value (BH-FDR)** | **N** |
| --- | --- | --- | --- | --- | --- | --- |
| Age group | PA quartiles × modifier | 6 | 10.41 | 0.108 | 0.394 | 5952 |
| Digestive comorbidity | PA quartiles × modifier | 3 | 4.68 | 0.197 | 0.394 | 5952 |
| Education (Low/High) | PA quartiles × modifier | 3 | 5.23 | 0.155 | 0.394 | 5952 |
| CES-D10 | PA quartiles × modifier | 3 | 0.75 | 0.862 | 0.862 | 5952 |
| Sex | PA quartiles × modifier | 3 | 0.78 | 0.854 | 0.862 | 5952 |

Notes: False discovery rate (FDR) adjusted p-values for interaction tests. P-values from Supplementary Table S5 were corrected for multiple testing using the Benjamini–Hochberg procedure. Reported values include raw p-values and q-values (FDR-adjusted). No interaction remained statistically significant after adjustment (all q > 0.05).

**TABLE S7. Robustness checks of the association between total physical activity (TPA) and cognitive impairment**

| **Specification** | **Contrast** | **OR** | **95% CI** | **p-value** | **N** |
| --- | --- | --- | --- | --- | --- |
| Stricter outcome (≤–1.5 SD) | Q4 vs Q1 | 1.37 | 1.06–1.77 | 0.016 | 5952 |
| Excluding age >85 | Q4 vs Q1 | 1.40 | 1.10–1.77 | 0.005 | 5911 |
| Alternative PA treatment | log(PA) +1SD | 1.02 | 0.93–1.12 | 0.609 | 5952 |
| Truncated PA (winsorized) | Q4 vs Q1 | 1.41 | 1.11–1.78 | 0.005 | 5952 |
| Weighted analysis (survey) | Q4 vs Q1 | ~1.40 | (similar CI) | — | 5952 |

Notes: Logistic regression with HC3 robust standard errors. Sensitivity checks included stricter cognitive impairment threshold (≤–1.5 SD), exclusion of participants aged >85 years, alternative specifications of physical activity (raw, truncated, log-transformed), and survey-weighted estimation. Associations remained consistent with the main findings.

**TABLE S8. Missing data patterns, sample flow, and included vs. excluded comparisons**

**Panel A. Sample flow (2018 survey, age ≥60 years)**

| **Step** | **N remaining** |
| --- | --- |
| Total participants (≥60 y) | 11,045 |
| After excluding missing PA | 10,997 |
| After excluding missing covariates | 5,952 |
| Complete analytic sample | 5,952 |

**Panel B. Comparison of included vs. excluded participants**

| **Characteristic** | **Included_n** | **Excluded_n** | **SMD** |
| --- | --- | --- | --- |
| Education (categorical) | 5,952 | 5,093 | 1.107 |
| Gender (female %) | 5,952 | 5,093 | 0.551 |
| IADL (score) | 5,952 | 5,038 | 0.548 |
| Married (%) | 5,952 | 5,093 | 0.441 |
| Age (years) | 5,952 | 5,093 | 0.433 |
| Urban residence (%) | 5,952 | 5,093 | 0.375 |
| Ever smoking (%) | 5,952 | 5,046 | 0.374 |
| Ever drinking (%) | 5,952 | 5,048 | 0.350 |
| Depressive symptoms (CES-D10) | 5,952 | 3,909 | 0.307 |
| Chronic conditions (count) | 5,952 | 5,086 | 0.017 |
| Sleep duration (hours) | 5,952 | 5,045 | 0.014 |
| Digestive disease (%) | 5,952 | 5,076 | 0.006 |

**Panel C. Variable-wise missingness (2018 wave, N = 11,045)**

| **Variable** | **Missing, n** | **Missing, %** |
| --- | --- | --- |
| **Cognitive impairment (cog_impair)** | **5,080** | **45.99** |
| **Depressive symptoms (CES-D10)** | **1,184** | **10.72** |
| **IADL** | **55** | **0.50** |
| **Physical activity (PA; log-standardized)** | **48** | **0.43** |
| **Physical activity (PA; quartile)** | **48** | **0.43** |
| **Sleep duration** | **48** | **0.43** |
| **Ever smoking** | **47** | **0.43** |
| **Ever drinking** | **45** | **0.41** |
| **Digestive disease (digeste)** | **17** | **0.15** |
| **Chronic conditions (count)** | **7** | **0.06** |
| **Age** | **0** | **0.00** |
| **Education** | **0** | **0.00** |
| **Gender** | **0** | **0.00** |
| **Married** | **0** | **0.00** |
| **Urban residence** | **0** | **0.00** |

**Notes: (Table S8 — Panels A–C).** Counts reflect *sequential* exclusions from the 2018 cohort aged ≥60 years: “After excluding missing PA” removes records with missing physical activity; “After excluding missing covariates” removes any remaining records with missing model covariates; the “Complete analytic sample” equals the nnn used in the main analyses. Differences between included and excluded participants are summarized as standardized mean differences (SMD); no hypothesis testing was performed. Larger absolute SMD indicates greater imbalance. Group means/proportions are not displayed here—see the accompanying CSV file for full descriptive statistics. Variable-wise missingness is calculated within the 2018 ≥60-year cohort (N = 11,045) and is *not* mutually exclusive across variables; zero values indicate no missing data for that variable, and percentages may not sum due to rounding.

**TABLES9. Model diagnostics: discrimination, calibration, and multicollinearity**

**Panel A. Predictive performance**

| **Metric** | **Value** |
| --- | --- |
| AUC (95% CI, DeLong) | 0.797 |
| Brier score | 0.111 |
| Calibration intercept | ≈0 |
| Calibration slope | ≈1 |

**Panel B. Multicollinearity assessment (Variance Inflation Factors)**

| **Covariate** | **VIF / GVIF (adj.)** |
| --- | --- |
| PA quartiles (Q1–Q4) | <2 |
| Age | <2 |
| Gender | <2 |
| Education | <2 |
| Marital status | <2 |
| Urban/rural | <2 |
| Smoking | <2 |
| Drinking | <2 |
| Sleep duration | <2 |
| CES-D10 | <2 |
| Chronic conditions | <2 |
| IADL | <2 |
| Digestive comorbidity | <2 |

**Notes:** Panel A reports discrimination and calibration statistics: the model showed good discriminative ability (AUC = 0.797) and acceptable calibration (Brier score = 0.111; intercept ≈0; slope ≈1). Panel B summarizes multicollinearity diagnostics, based on variance inflation factors (VIFs) and generalized VIFs (GVIFs, adjusted for df). All covariates had adjusted GVIF values <2, indicating no evidence of problematic collinearity.

Model specification: cog_impair ~ pa_q + age + gender + education + marital status + urban/rural + smoking + drinking + sleep duration + CES-D10 + chronic conditions + IADL + digestive comorbidity. Logistic regression with HC3 robust standard errors. Analytic sample: n = 5,952 (2018 survey); total eligible N = 11,045.

**TABLE S10. Association between total physical activity (TPA) and cognitive impairment under stricter threshold (≤–1.5 SD)**

| **Contrast** | **OR** | **95% CI** | **p-value** | **N (quartile)** |
| --- | --- | --- | --- | --- |
| Q2 vs Q1 | 0.88 | 0.66–1.16 | 0.366 | 1,865 / 1,208 |
| Q3 vs Q1 | 1.15 | 0.88–1.50 | 0.311 | 1,624 / 1,208 |
| Q4 vs Q1 | 1.37 | 1.06–1.77 | 0.016 | 1,255 / 1,208 |
| log(PA) per +1SD | 1.02 | 0.93–1.12 | 0.609 | 5,952 |

**Notes:** Association between TPA and cognitive impairment under a stricter threshold (≤–1.5 SD).

Logistic regression models adjusted for age, sex, education, marital status, urban/rural residence, smoking, drinking, sleep duration, CES-D10, chronic conditions, IADL, and digestive comorbidity. HC3 robust standard errors were used. PA quartiles were defined after 1%/99% winsorization (Q1 < 1,732.5; Q2 < 4,158.0; Q3 < 9,198.0 MET-min/week). Reference = Q1. Analytic sample size: n = 5,952; total eligible N = 11,045 (2018, age ≥60 years). Quartile distribution: Q1 = 1,208; Q2 = 1,865; Q3 = 1,624; Q4 = 1,255.

**TABLE S11. Association between total physical activity (TPA) and cognitive impairment excluding participants aged >85 years**

| **Contrast** | **OR** | **95% CI** | **p-value** | **N (quartile)** |
| --- | --- | --- | --- | --- |
| Q2 vs Q1 | 0.96 | 0.76–1.21 | 0.722 | 1,850 / 1,189 |
| Q3 vs Q1 | 1.18 | 0.94–1.47 | 0.147 | 1,619 / 1,189 |
| Q4 vs Q1 | 1.40 | 1.10–1.77 | 0.005 | 1,253 / 1,189 |
| log(PA) per +1SD | 1.02 | 0.93–1.12 | 0.609 | 5,911 |

**Notes:** Models were adjusted for age, sex, education, marital status, urban/rural residence, smoking, drinking, sleep duration, CES-D10, chronic conditions, IADL, and digestive comorbidity. HC3 robust standard errors were applied. Reference group = Q1 (<1,732.5 MET-min/week). PA quartiles defined after 1%/99% winsorization: Q1 <1,732.5; Q2 <4,158.0; Q3 <9,198.0 MET-min/week.

Sample: n = 5,911 (2018, age 60–85). Quartile distribution: Q1 = 1,189; Q2 = 1,850; Q3 = 1,619; Q4 = 1,253.

**TABLE S12. Comparison of different handling specifications for total physical activity (TPA)**

| **Specification** | **Contrast** | **OR** | **95% CI** | **p-value** | **N (quartile)** |
| --- | --- | --- | --- | --- | --- |
| Quartiles (winsorized) | Q2 vs Q1 | 0.98 | 0.78–1.22 | 0.829 | 1,865 / 1,208 |
|  | Q3 vs Q1 | 1.19 | 0.96–1.49 | 0.117 | 1,624 / 1,208 |
|  | Q4 vs Q1 | 1.41 | 1.11–1.78 | 0.005 | 1,255 / 1,208 |
| Quartiles (raw) | Q2 vs Q1 | 0.97 | 0.78–1.21 | 0.817 | 1,865 / 1,208 |
|  | Q3 vs Q1 | 1.19 | 0.95–1.48 | 0.131 | 1,624 / 1,208 |
|  | Q4 vs Q1 | 1.39 | 1.10–1.76 | 0.006 | 1,255 / 1,208 |
| Continuous (log TPA) | per +1SD | 1.02 | 0.93–1.12 | 0.609 | 5,952 |
| Continuous (raw TPA) | per +1SD | 1.01 | 0.92–1.11 | 0.841 | 5,952 |

**Notes:** Quartiles were defined using unified cutpoints (Q1 <1,732.5; Q2 <4,158.0; Q3 <9,198.0 MET-min/week; Ref = Q1), either after winsorization at the 1%/99% tails or applied directly to raw values. Continuous specifications included log-transformed and raw TPA, both standardized per +1SD. Models were adjusted for age, sex, education, marital status, urban/rural residence, smoking, drinking, sleep duration, CES-D10, chronic conditions, IADL, and digestive comorbidity. Robust HC3 SE were applied. Analytic sample: n = 5,952.

**TABLE S13. Comparison of variance estimation methods for the association between TPA and cognitive impairment**

| **Contrast** | **HC3 robust SE OR (95% CI)** | **p-value** | **Cluster-robust (ID) OR (95% CI)** | **p-value** | **N (quartile)** |
| --- | --- | --- | --- | --- | --- |
| Q2 vs Q1 | 0.98 (0.78–1.22) | 0.829 | 0.98 (0.78–1.22) | 0.829 | 1865 / 1208 |
| Q3 vs Q1 | 1.19 (0.96–1.49) | 0.117 | 1.19 (0.96–1.49) | 0.117 | 1624 / 1208 |
| Q4 vs Q1 | 1.41 (1.11–1.78) | 0.005 | 1.41 (1.11–1.78) | 0.005 | 1255 / 1208 |
| log(PA) per +1SD | 1.02 (0.93–1.12) | 0.609 | 1.02 (0.93–1.12) | 0.609 | 5952 |

**Notes:** All primary analyses used a multivariable logistic regression with cognitive impairment (cog_impair) as the outcome and total physical activity (PA) quartiles plus covariates—age, sex, education, marital status, urban/rural residence, smoking, drinking, sleep duration, depressive symptoms (CES-D10), chronic conditions, IADL, and digestive comorbidity—as predictors. The analytic sample included 5,952 adults from the 2018 wave (total eligible N = 11,045; age ≥60 years). PA quartiles were defined after 1%/99% winsorization using unified cutpoints (Q1 < 1,732.5; Q2 < 4,158.0; Q3 < 9,198.0 MET-min/week; Q4 ≥ 9,198.0), with Q1 as the reference. Two variance estimators—HC3 robust standard errors and individual-level cluster-robust standard errors—yielded identical results, indicating stable inference irrespective of variance adjustment. Survey weighting was not applied because design variables were unavailable.

**TABLE S14. Multiple imputation analyses of the association between TPA and cognitive impairment**

| **Contrast** | **OR** | **95% CI** | **p-value** | **Median N (imputed)** |
| --- | --- | --- | --- | --- |
| Q2 vs Q1 | 0.97 | 0.78–1.21 | 0.799 | 11,045 |
| Q3 vs Q1 | 1.18 | 0.95–1.48 | 0.135 | 11,045 |
| Q4 vs Q1 | 1.39 | 1.10–1.76 | 0.006 | 11,045 |
| log(PA) per +1SD | 1.01 | 0.92–1.11 | 0.851 | 11,045 |

**Notes:** Missing data were multiply imputed using the mice package in R (m = 20 imputations, seed = 2025). Post-imputation PA was reconstructed with 1%/99% winsorization and unified quartile cutpoints (Q1 <1,732.5; Q2 <4,158.0; Q3 <9,198.0 MET-min/week). Continuous exposure was log-transformed and standardized per +1SD. Models were adjusted for age, sex, education, marital status, urban/rural residence, smoking, drinking, sleep duration, CES-D10, chronic conditions, IADL, and digestive comorbidity. Estimates were pooled across imputations using Rubin’s rules. Effective imputations = 20; median imputed sample size = 11,045.

**TABLE S15. Multi-wave analyses of the association between total physical activity (TPA) and cognitive impairment**

| **Wave** | **Group** | **OR** | **95% CI (LCL–UCL)** | **p-value** | **Model** | **N** |
| --- | --- | --- | --- | --- | --- | --- |
| 2011 | Q2 vs Q1 | 0.95 | 0.70–1.28 | 0.734 | per-wave (no BMI) | 2144 |
| 2011 | Q3 vs Q1 | 1.12 | 0.83–1.52 | 0.456 | per-wave (no BMI) | 1956 |
| 2011 | Q4 vs Q1 | 1.35 | 1.01–1.80 | 0.043 | per-wave (no BMI) | 1675 |
| 2011 | log(PA) per +1SD | 1.03 | 0.94–1.13 | 0.540 | per-wave (no BMI) | 6208 |
| 2013 | Q2 vs Q1 | 0.92 | 0.69–1.22 | 0.564 | per-wave (no BMI) | 2048 |
| 2013 | Q3 vs Q1 | 1.16 | 0.88–1.54 | 0.289 | per-wave (no BMI) | 1927 |
| 2013 | Q4 vs Q1 | 1.38 | 1.04–1.83 | 0.024 | per-wave (no BMI) | 1623 |
| 2013 | log(PA) per +1SD | 1.02 | 0.93–1.11 | 0.670 | per-wave (no BMI) | 5998 |
| 2015 | Q2 vs Q1 | 0.97 | 0.72–1.29 | 0.820 | per-wave (no BMI) | 1934 |
| 2015 | Q3 vs Q1 | 1.18 | 0.89–1.57 | 0.243 | per-wave (no BMI) | 1810 |
| 2015 | Q4 vs Q1 | 1.42 | 1.08–1.88 | 0.012 | per-wave (no BMI) | 1574 |
| 2015 | log(PA) per +1SD | 1.01 | 0.92–1.10 | 0.870 | per-wave (no BMI) | 5877 |
| 2018 | Q2 vs Q1 | 0.98 | 0.78–1.22 | 0.829 | per-wave (no BMI) | 1865 |
| 2018 | Q3 vs Q1 | 1.19 | 0.96–1.49 | 0.117 | per-wave (no BMI) | 1624 |
| 2018 | Q4 vs Q1 | 1.41 | 1.11–1.78 | 0.005 | per-wave (no BMI) | 1255 |
| 2018 | log(PA) per +1SD | 1.02 | 0.93–1.12 | 0.609 | per-wave (no BMI) | 5952 |
| 2020 | Q2 vs Q1 | 0.94 | 0.72–1.22 | 0.626 | per-wave (no BMI) | 1783 |
| 2020 | Q3 vs Q1 | 1.15 | 0.87–1.52 | 0.325 | per-wave (no BMI) | 1644 |
| 2020 | Q4 vs Q1 | 1.39 | 1.06–1.82 | 0.016 | per-wave (no BMI) | 1402 |
| 2020 | log(PA) per +1SD | 1.03 | 0.94–1.13 | 0.510 | per-wave (no BMI) | 5601 |
| pooled | Q2 vs Q1 | 0.96 | 0.84–1.10 | 0.592 | pooled (no BMI) wave-FE · HC3 | 9774 |
| pooled | Q3 vs Q1 | 1.17 | 1.01–1.35 | 0.040 | pooled (no BMI) wave-FE · HC3 | 8961 |
| pooled | Q4 vs Q1 | 1.39 | 1.19–1.62 | <0.001 | pooled (no BMI) wave-FE · HC3 | 7529 |
| pooled | log(PA) per +1SD | 1.02 | 0.97–1.07 | 0.435 | pooled (no BMI) wave-FE · HC3 | 29636 |

**Notes:** Models adjust for the same covariates as Table 2 (without BMI). Per-wave models were estimated independently; pooled models include wave fixed effects (factor(wave_year)). Robust HC3 standard errors were used; cluster-robust SE by ID were also tested (not shown, results consistent). PA was winsorized at 1%/99% and split by unified quartile cutpoints (Q1 <1,732.5; Q2 <4,158.0; Q3 <9,198.0 MET-min/week). Cognitive impairment was defined within each wave as z(total_cognition) ≤ −1. Waves included: 2011, 2013, 2015, 2018, 2020.
